# Supplementary material
Source: publisher site journal article supplement (https://www.dovepress.com/article/478512)
Supplement: Supplementary file 1 [file get_supplementary_file.php]

Appendix A1**
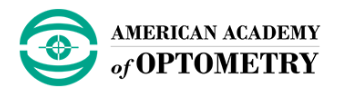
**: **AAO-African Chapter Survey**

1. Demographics
   1. In what African country do you practice?
   2. In which sector do you practice (Select all that apply)?
      1. Academia
      2. Private practice
      3. Corporate practice
      4. Government hospital
      5. Industry
      6. Ophthalmology
      7. Other: _____________
   3. In what age category are you?
      1. 20-29
      2. 30-39
      3. 40-49
      4. 50-59
      5. 60-60+
   4. What is your highest educational qualification?
      1. BSc
      2. OD
      3. Post graduate degree [e.g. Masters, PhD, DrPh]
   5. What is your Gender?
      1. Male
      2. Female
      3. Nonbinary [specify] ________________________
      4. Prefer not to say
   6. Are you a member of any other professional association beside your country Optometry association?
      1. Yes
      2. No
      3. If yes, specify_____________________
2. General Academy
   1. How is the Academy regarded in comparison to other Optometric organizations in your country/region?
   2. How is the Academy perceived in your country/region?
   3. How can the Academy help with the Optometric profession in your country/region?
3. Fellowship
   1. Are you a member of the American Academy of Optometry?
      1. Yes
      2. No
      3. In the Candidacy for Fellowship Process
   2. Would you like to become a Fellow of the Academy?
      1. Yes
      2. No
      3. Not sure
   3. Before joining this WhatsApp group or hearing of the African Chapter of the Academy, were you aware that optometrists who are trained/practicing outside North America are eligible to obtain Fellowship in the AAO?
      1. Yes
      2. No
   4. What, if anything, was holding you back from applying for Fellowship?
   5. What resources could AAO provide that would assist in composing case reports? Select all that apply:
      1. Mentorship
      2. Journal access
      3. Example case reports
      4. Expanded acceptance of journals/presentations
      5. Informational session on available resources
   6. How would becoming a Fellow influence your career? (I.e: Fellowship counts towards promotion in some hospitals/academic institutions?) Select all that apply:
      1. Promotion in position
      2. Increase in salary
      3. Social/professional status
      4. Professional development
   7. Would you have any challenges in attending a live meeting for your oral examination (Answer this question if you are, or will be, a candidate for Fellowship)?
      1. Yes
      2. No
   8. What are the barriers (select the options that apply to you)?
      1. Travel cost
      2. Visa
      3. Language
      4. Time of the meeting
      5. Other: _________________
4. Academy Meeting
   1. Have you attended any Academy meeting?
      1. Yes
      2. No
      3. If yes, when was the last time you attended: ______________
   2. Are you interested in attending an Academy meeting in the future?
      1. Yes
      2. No
      3. Why: _____________
   3. What is your primary purpose for attending the Academy meeting?
      1. Continuing Education credits (ex: CPD, CEU, CME, etc)
      2. Networking
      3. Camaraderie
      4. Advanced training (ex: Scleral lens courses, etc)
      5. Research
      6. Giving a lecture presentation
      7. Giving a scientific presentation (poster or paper)
      8. Other: _____________

IV African Chapter of the Academy.

1. Prior to joining this platform, were you aware of the establishment of the African Chapter of the American Academy of Optometry?
   - 1. Yes
     2. No
   1. Would you like to become an official member of the African Chapter of AAO?
      1. Yes
      2. No
      3. Not sure
   2. How can you contribute to the African Chapter as an intending fellow?
   3. How is the African Chapter perceived in your country/region?
2. Thank you for taking the survey!
